# Supplementary material for: Titanium Tetrachloride-Assisted Direct Esterification of Carboxylic Acids
Source: MDPI journal article supplement (doi:10.3390/molecules29040777), 2024-02-08

# Supporting Information

## Titanium Tetrachloride-Assisted Direct Esterification of Carboxylic Acids

Palmira Alessia Cavallaro, Marzia De Santo, Marianna Greco, Rocco Marinaro, Emilia Lucia Belsito, Angelo Liguori and Antonella Leggio \*

Department of Pharmacy, Health and Nutritional Sciences, University of Calabria, Via P. Bucci, 87036 Arcavacata di Rende, Italy; alessia.cavallaro@unical.it (P.A.C.); marzia.desanto@unical.it (M.D.S.); mariannagreco.89@gmail.com (M.G.); roccomarinaro99@gmail.com (R.M.); emilialucia.belsito@unical.it (E.L.B.); angelo.liguori@unical.it (A.L.)

\* Correspondence: antonella.leggio@unical.it; Tel.: +39-0984-493199

### Table of contents

$^1\text{H}$ -NMR,  $^{13}\text{C}$ -NMR and MS (EI) spectra of compounds **1-14**

Pages: 2-28

# PROPYL PHENYLACETATE (1)

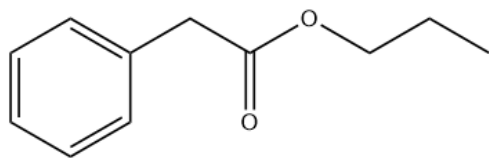

<sup>1</sup>H NMR

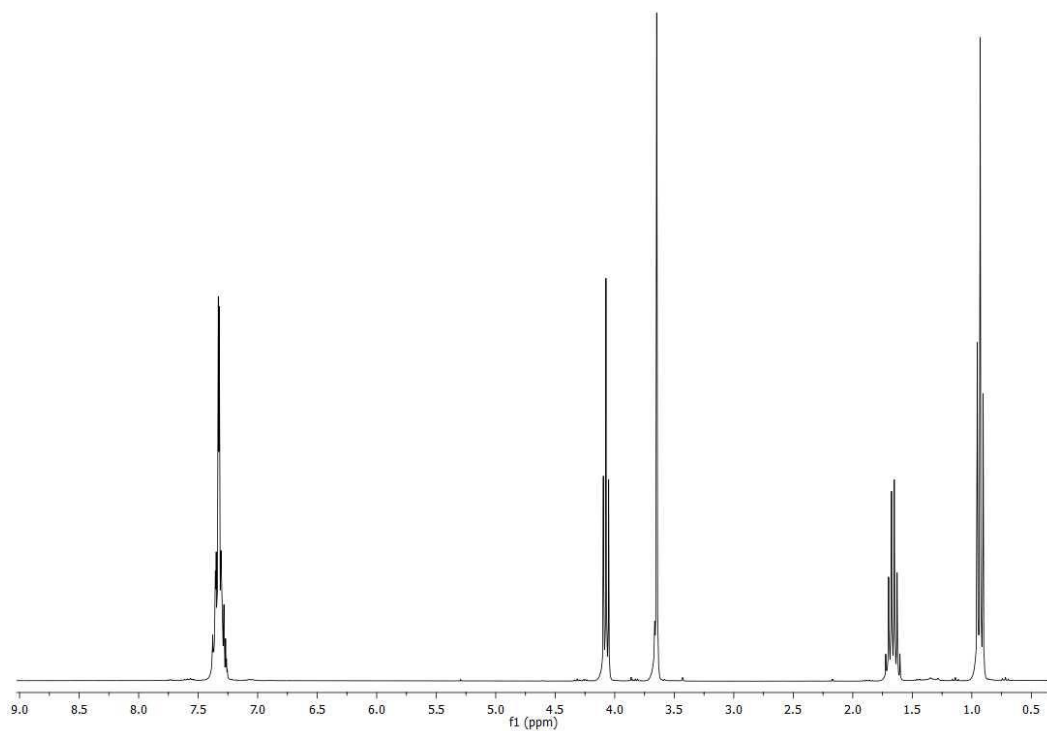

# <sup>13</sup>C NMR

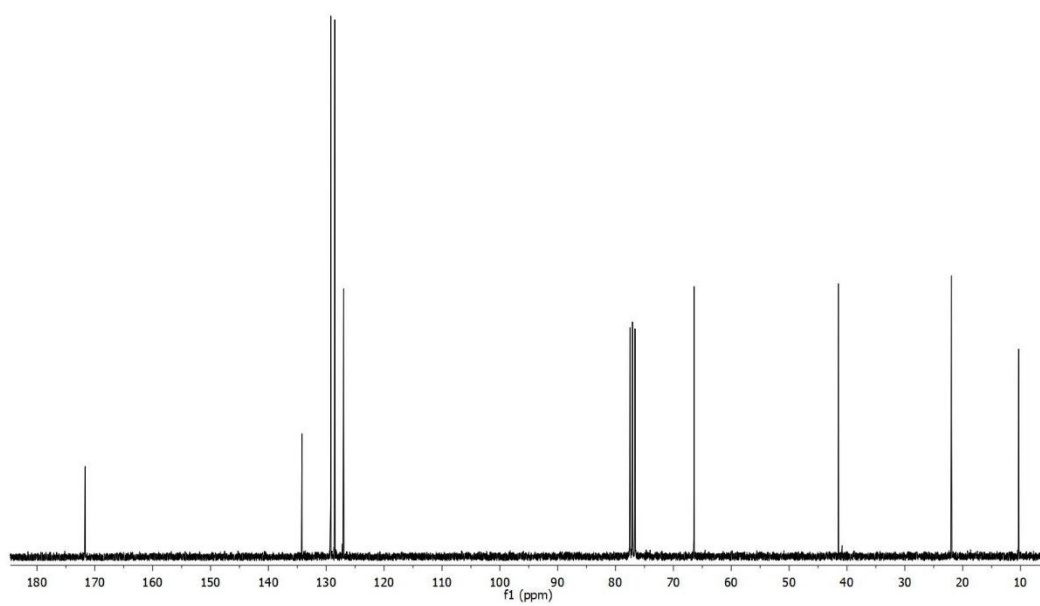

# MS (EI)

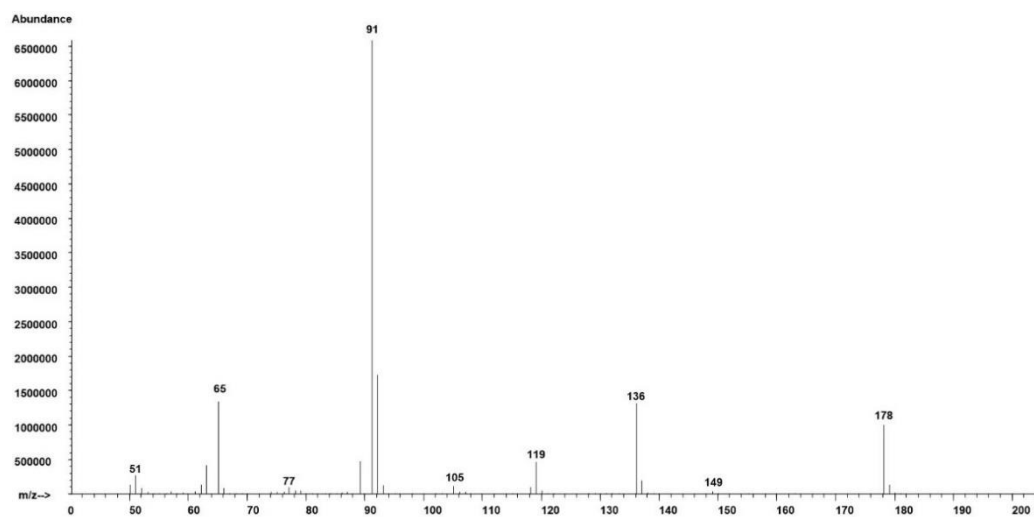

**PROPYL 4-METHOXYPHENYLACETATE (2)**

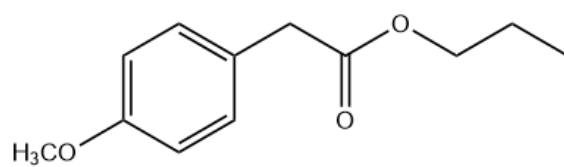

**<sup>1</sup>H NMR**

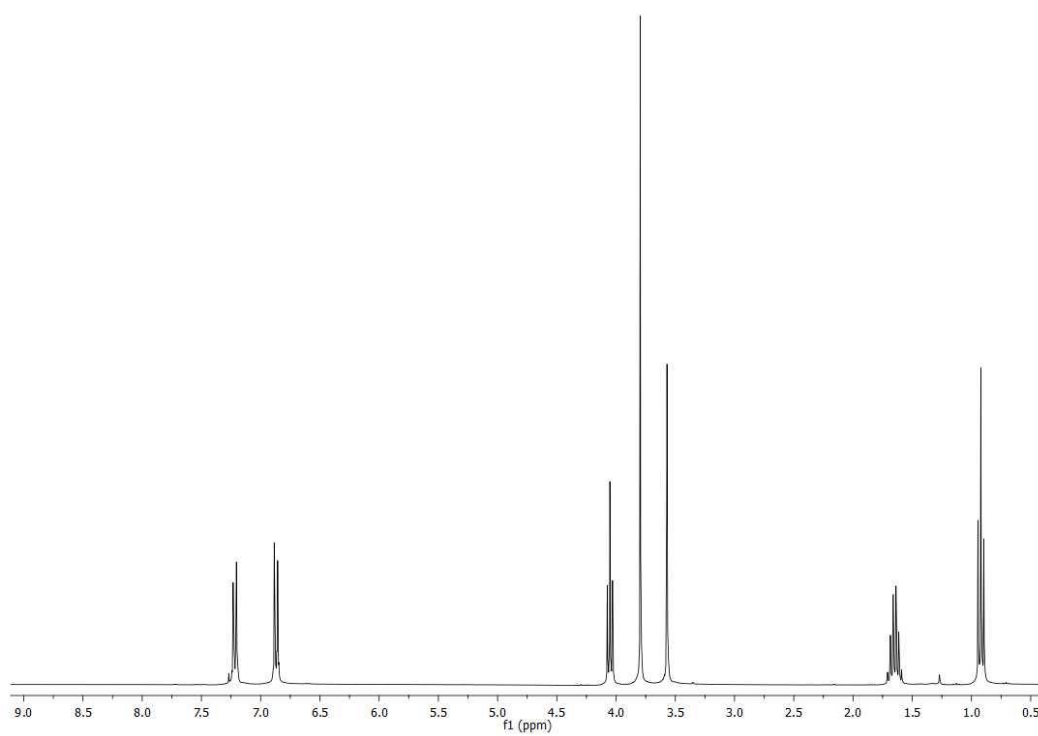

# <sup>13</sup>C NMR

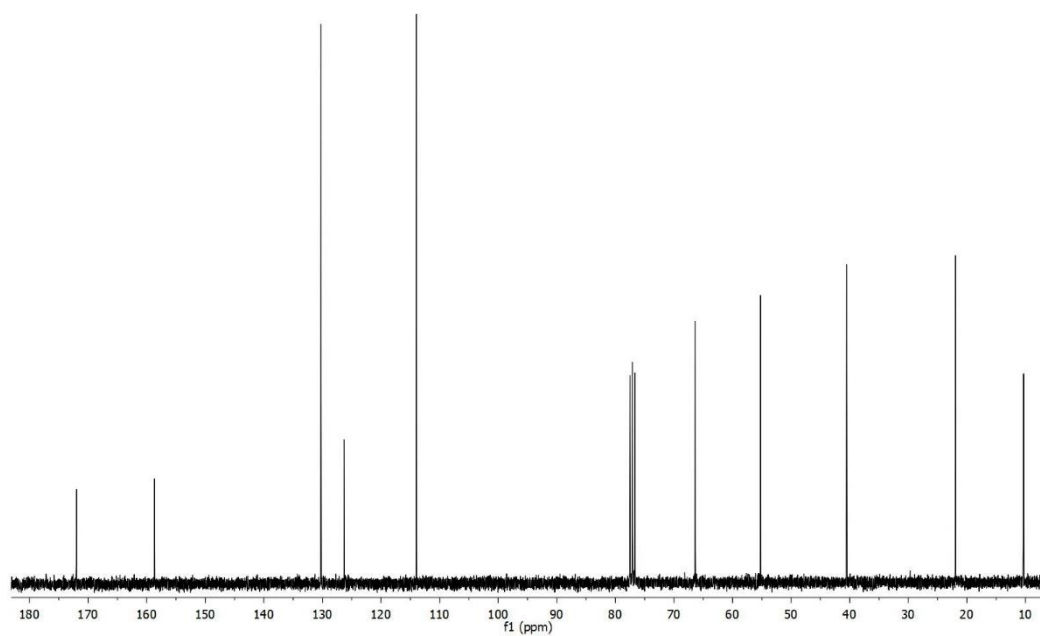

# MS (EI)

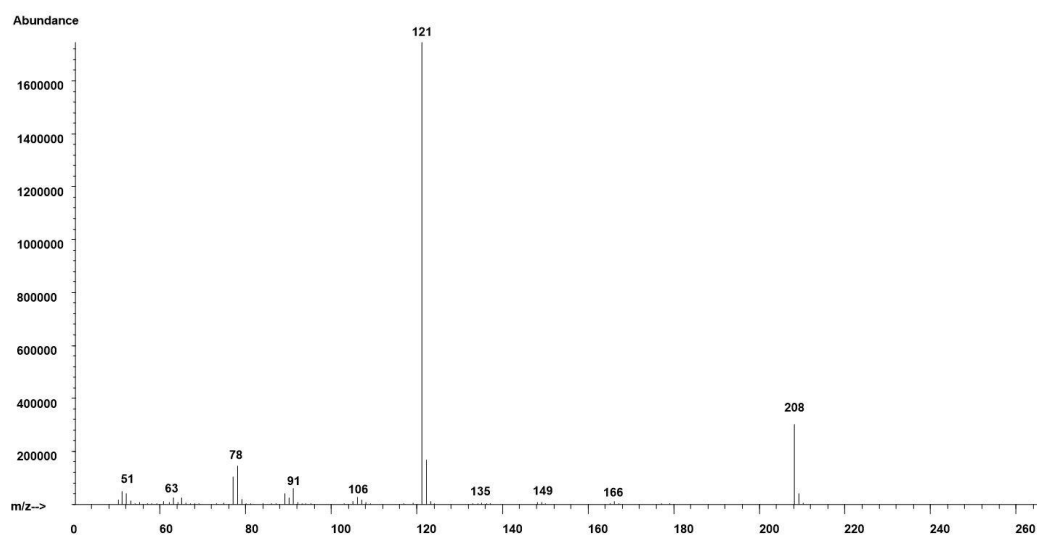

**PROPYL 4-CHLOROPHENYLACETATE (3)**

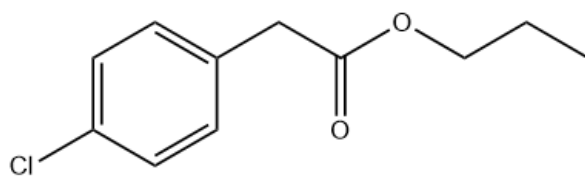

**<sup>1</sup>H NMR**

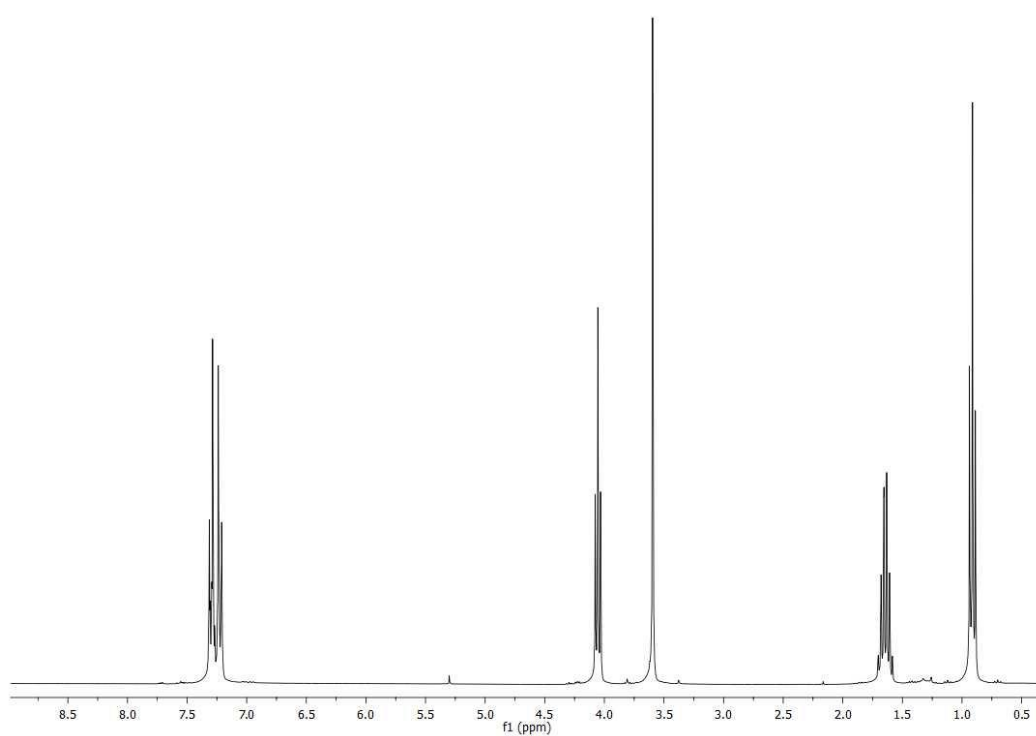

# <sup>13</sup>C NMR

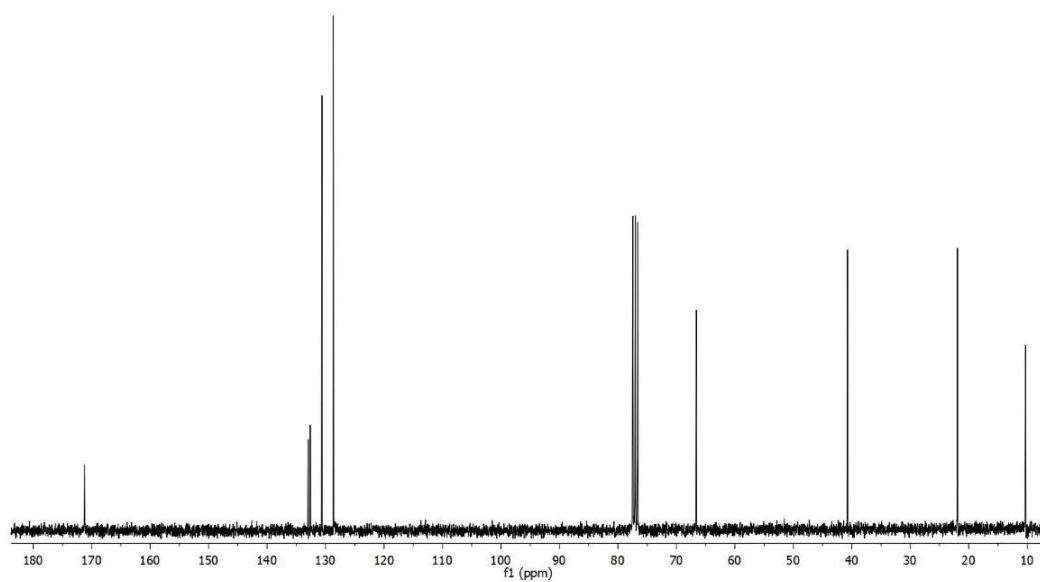

# MS (EI)

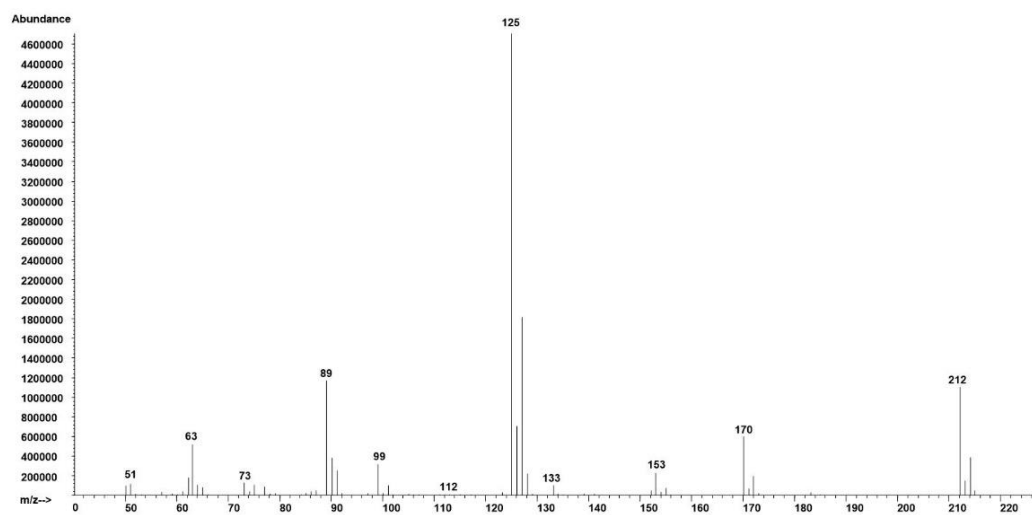

# PROPYL MYRISTATE (4)

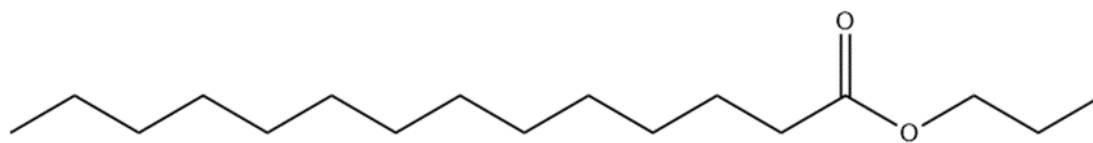

$^1\text{H}$  NMR

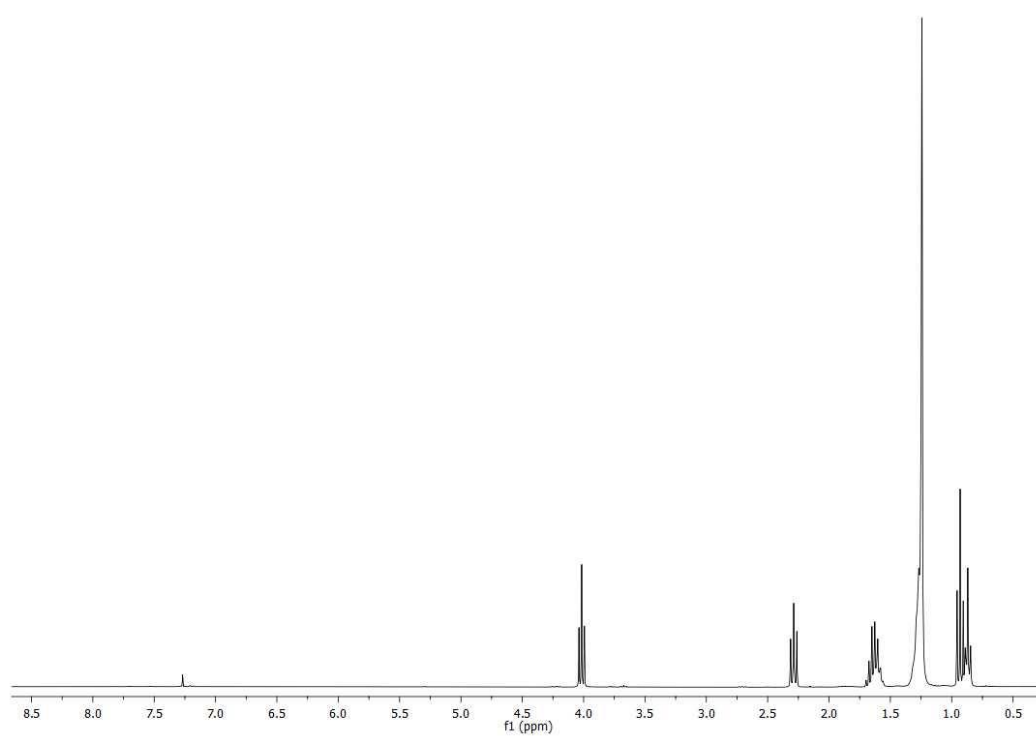



<sup>13</sup>C NMR

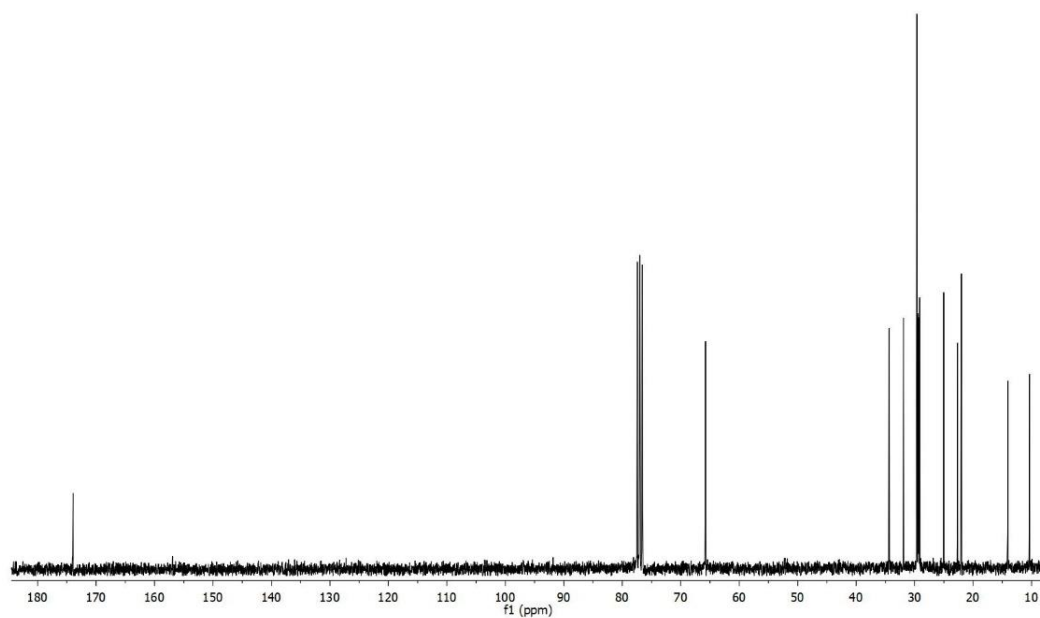

MS (EI)

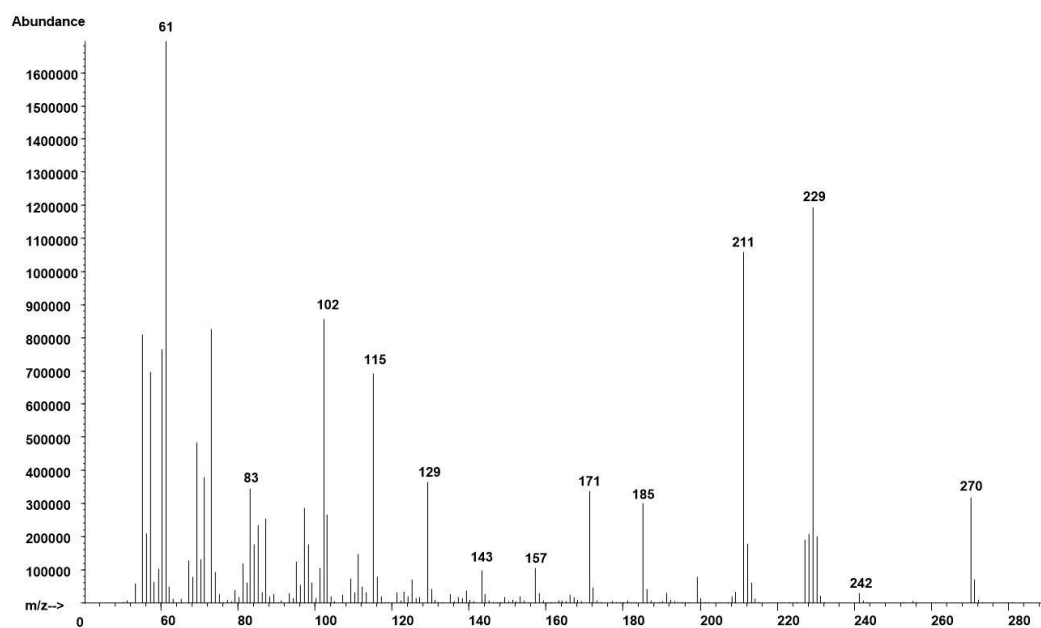

# PROPYL PALMITATE (5)

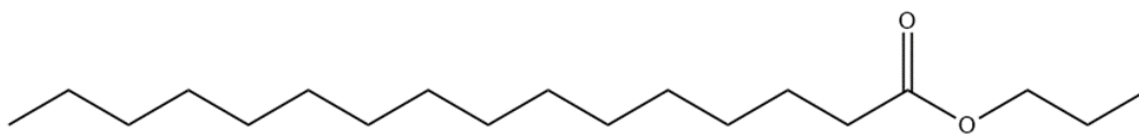

## $^1\text{H}$ NMR

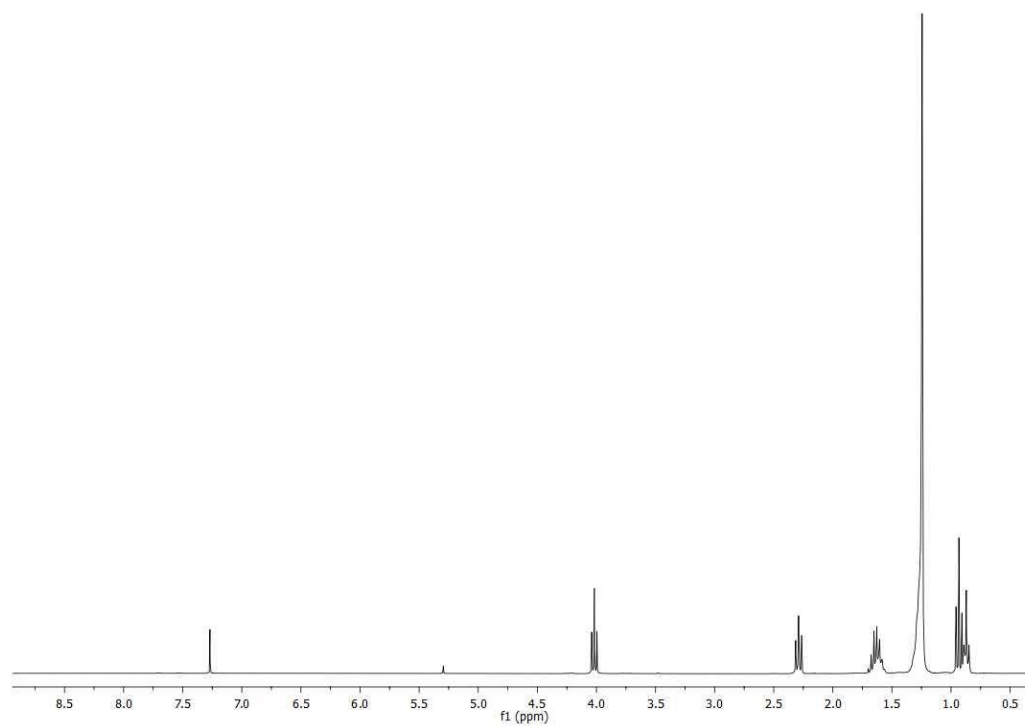

# <sup>13</sup>C NMR

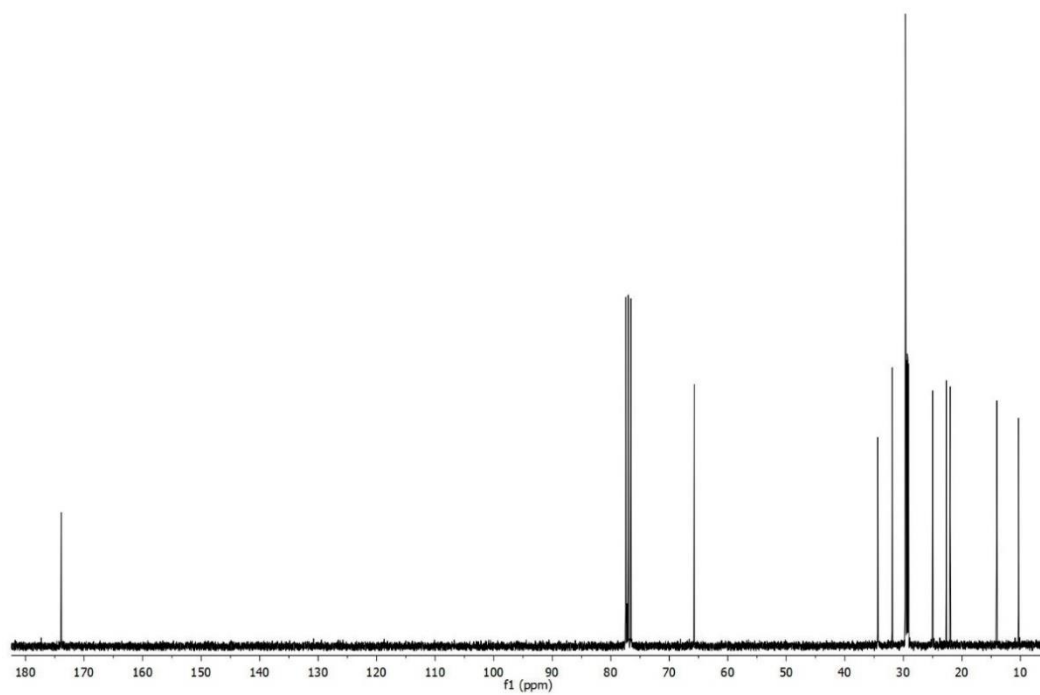

# MS (EI)

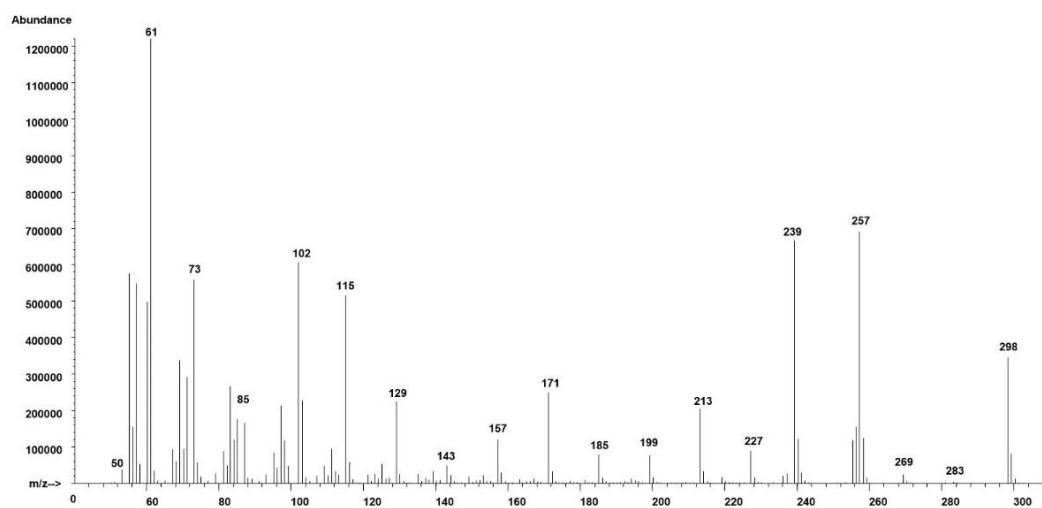

## PROPYL BENZOATE (6)

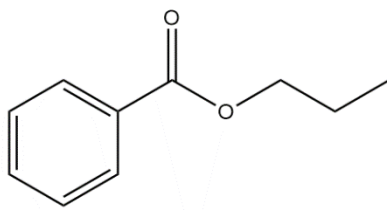

<sup>1</sup>H NMR

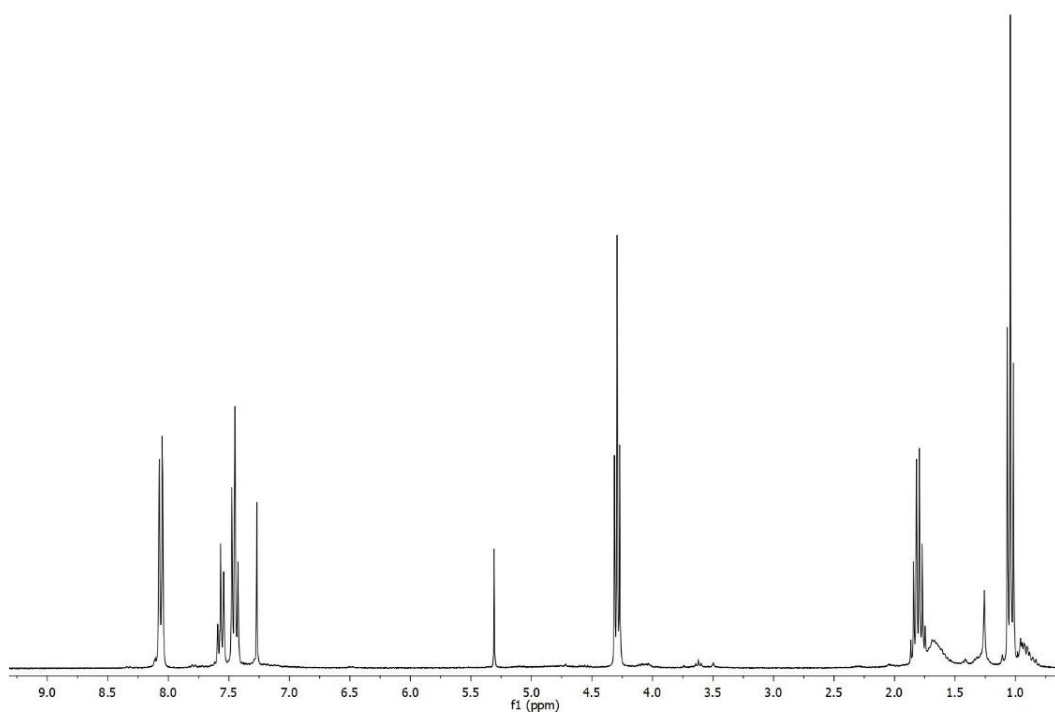

<sup>13</sup>C NMR

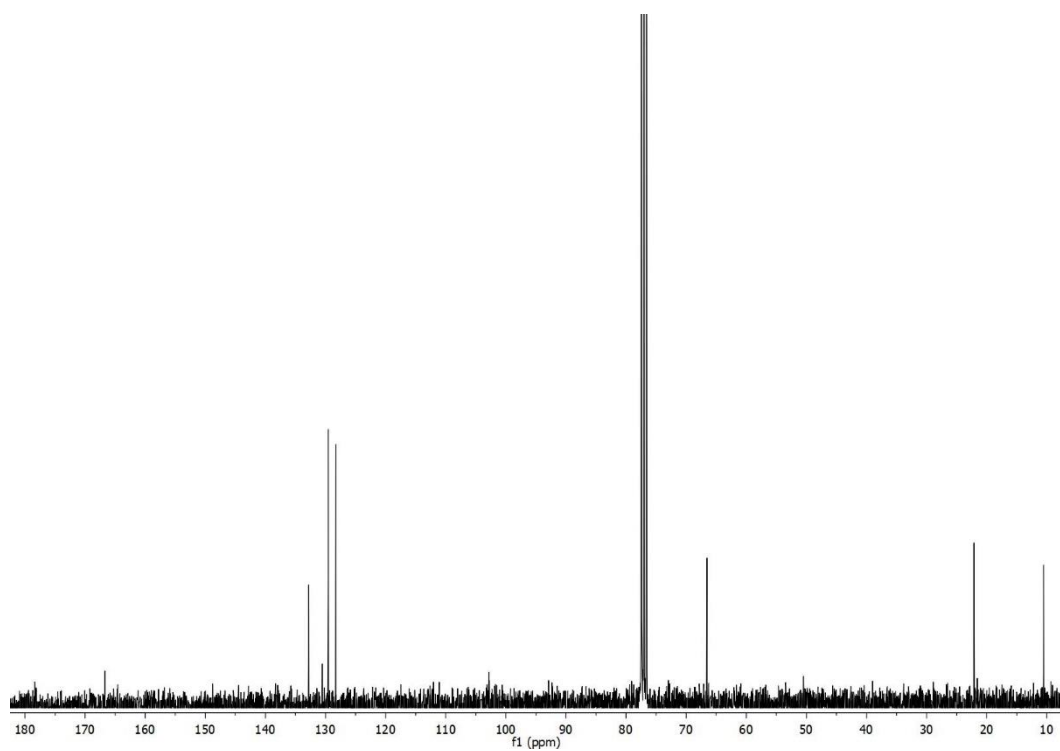

MS (EI)

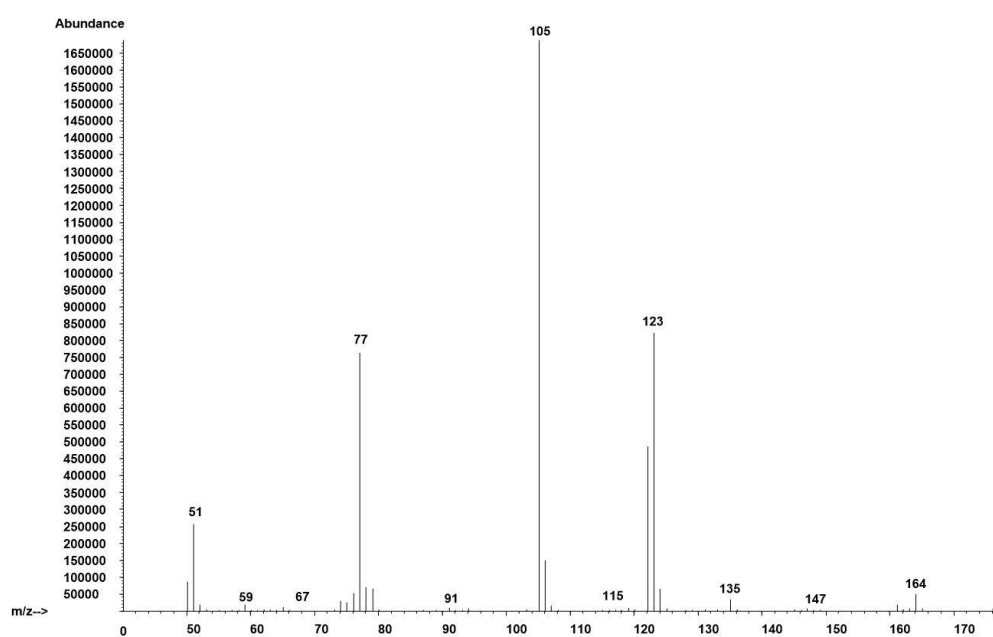

## N-FMOC-VALINE PROPYL ESTER (7)

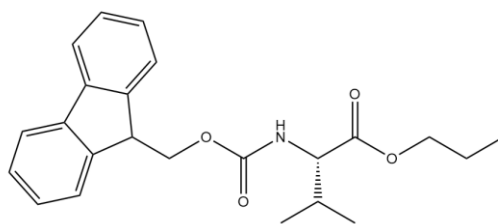

$^1\text{H}$  NMR

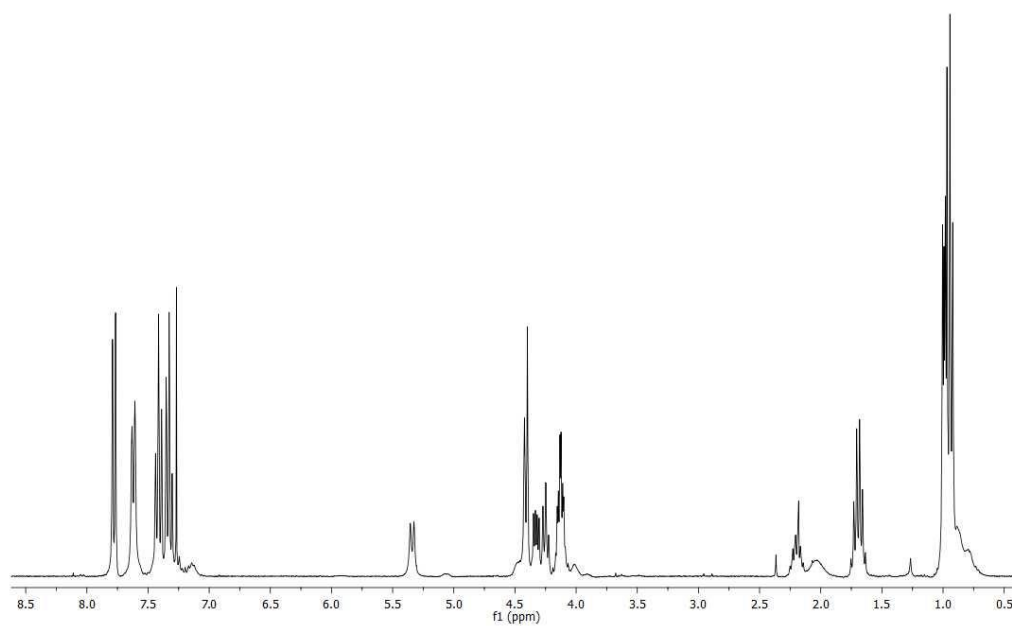

$^{13}\text{C}$  NMR

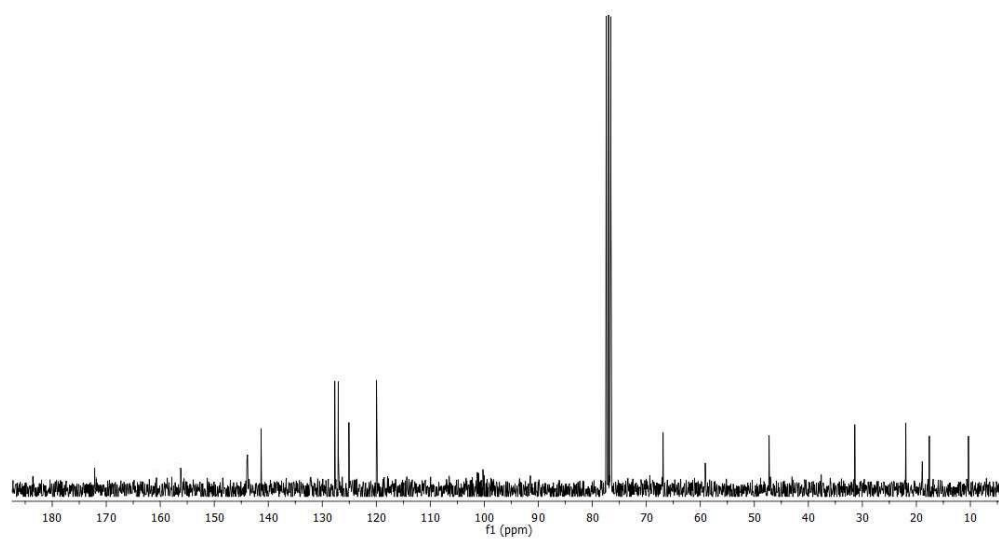

### 3-PHENYLPROPYL ACETATE (8)

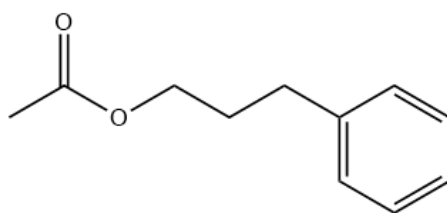

$^1\text{H}$  NMR

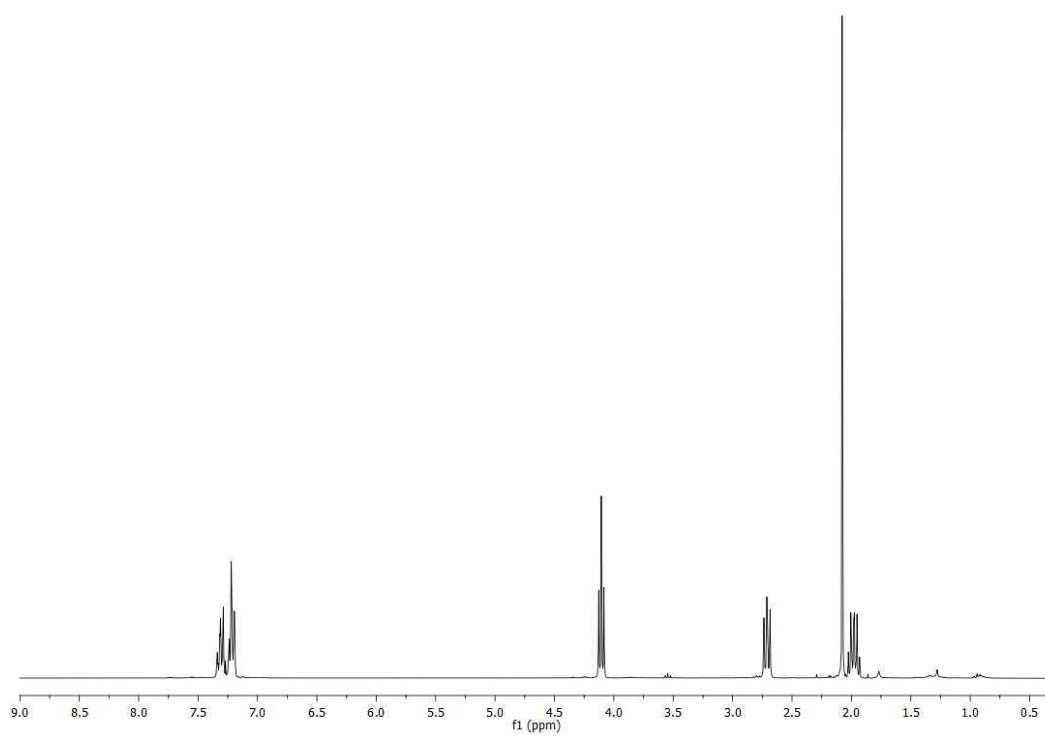

<sup>13</sup>C NMR

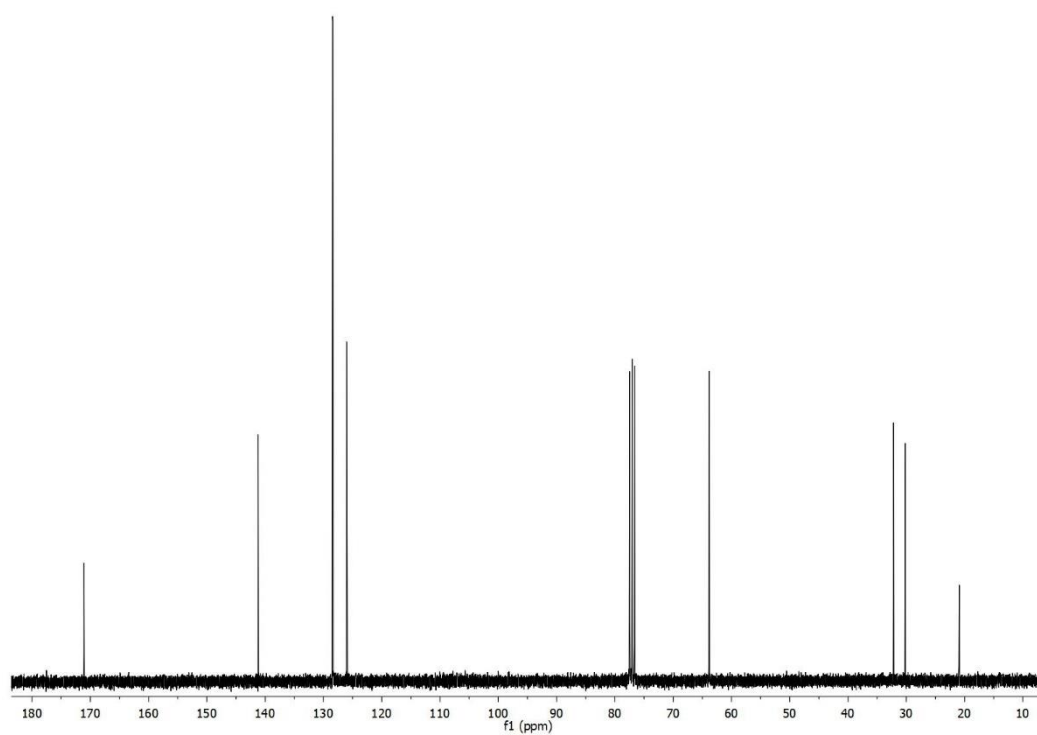

MS (EI)

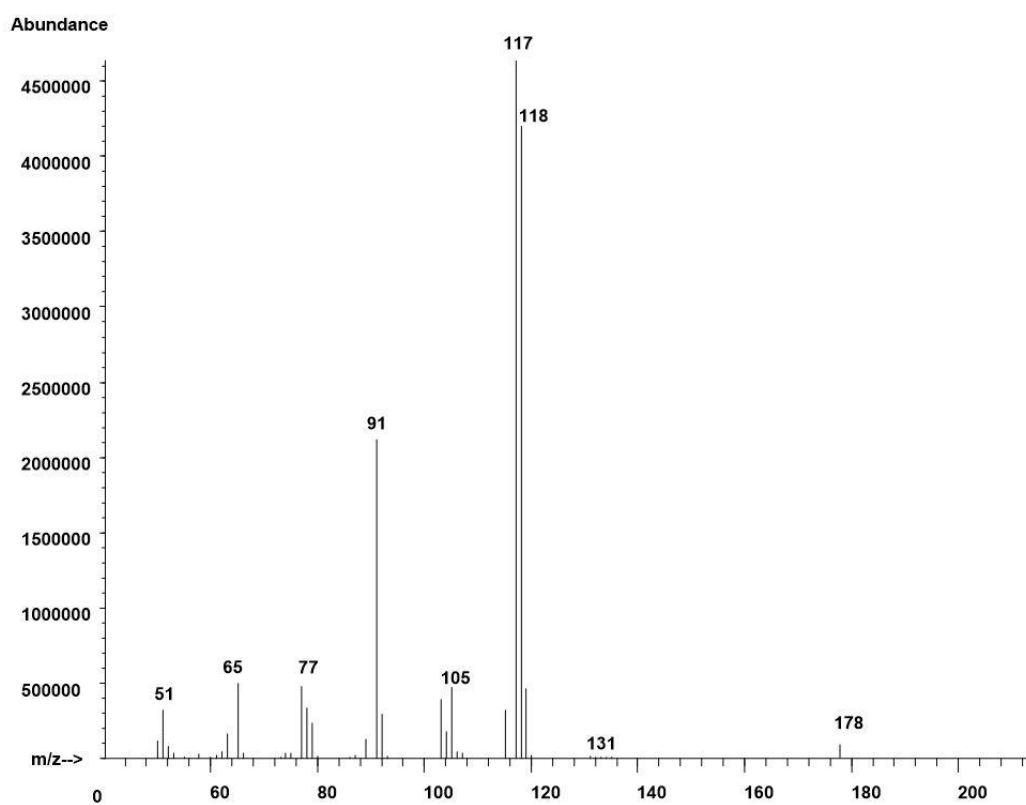



**3-PHENYLPROPYL  $\alpha$ -NAPHTHYLACETATE (9)**

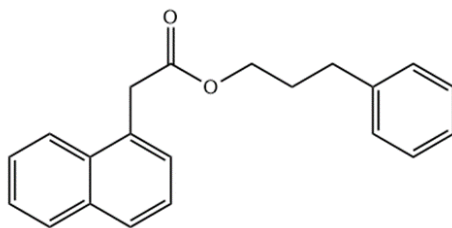

**$^1\text{H}$  NMR**

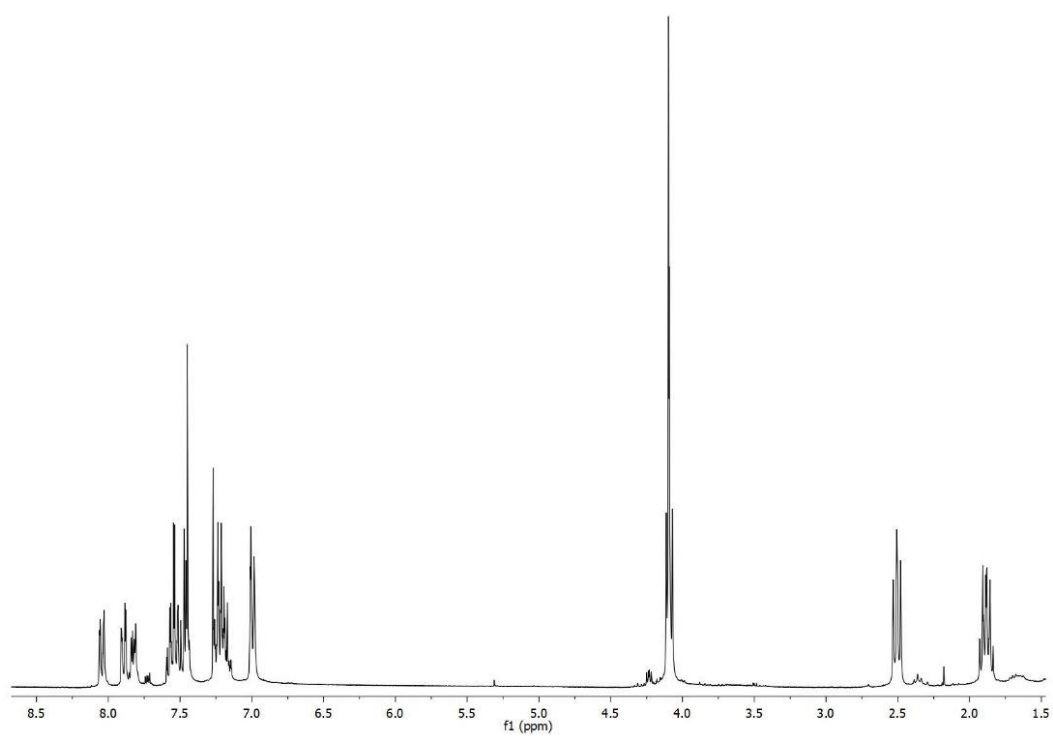

<sup>13</sup>C NMR

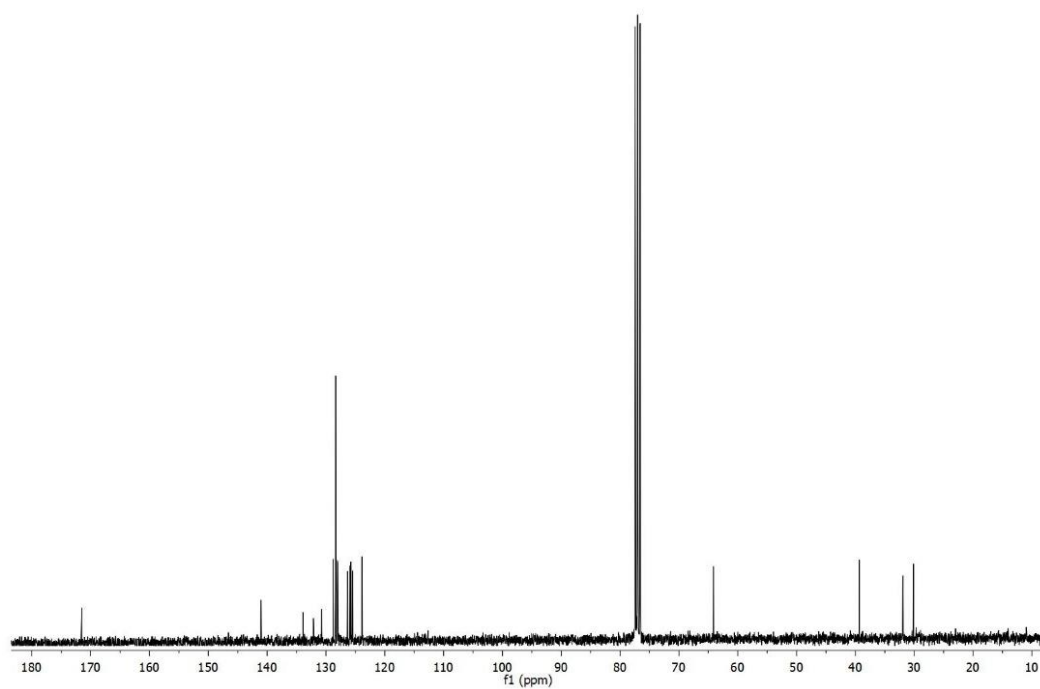

MS (EI)

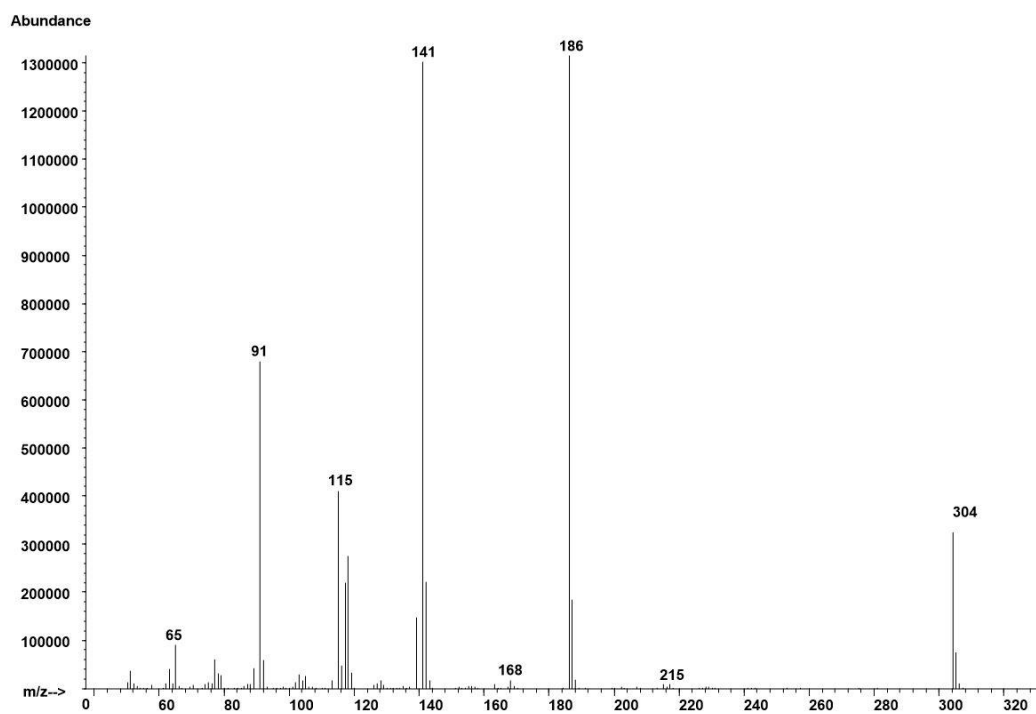

**3-PHENYLPROPYL 2-PHENYLBUTANOATE (10)**

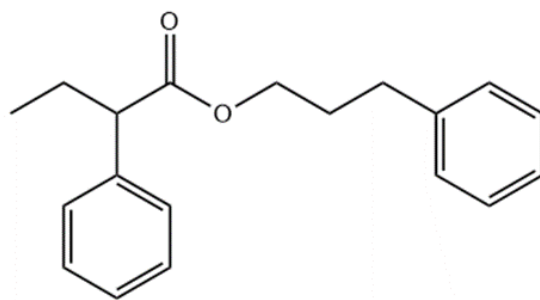

**$^1\text{H}$  NMR**

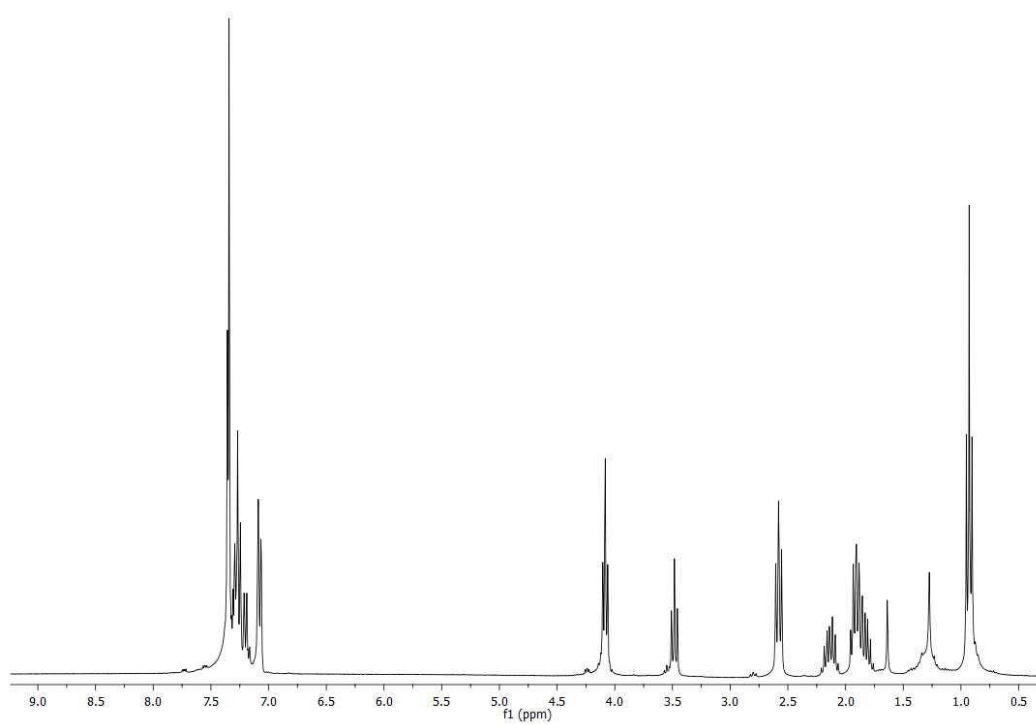

<sup>13</sup>C NMR

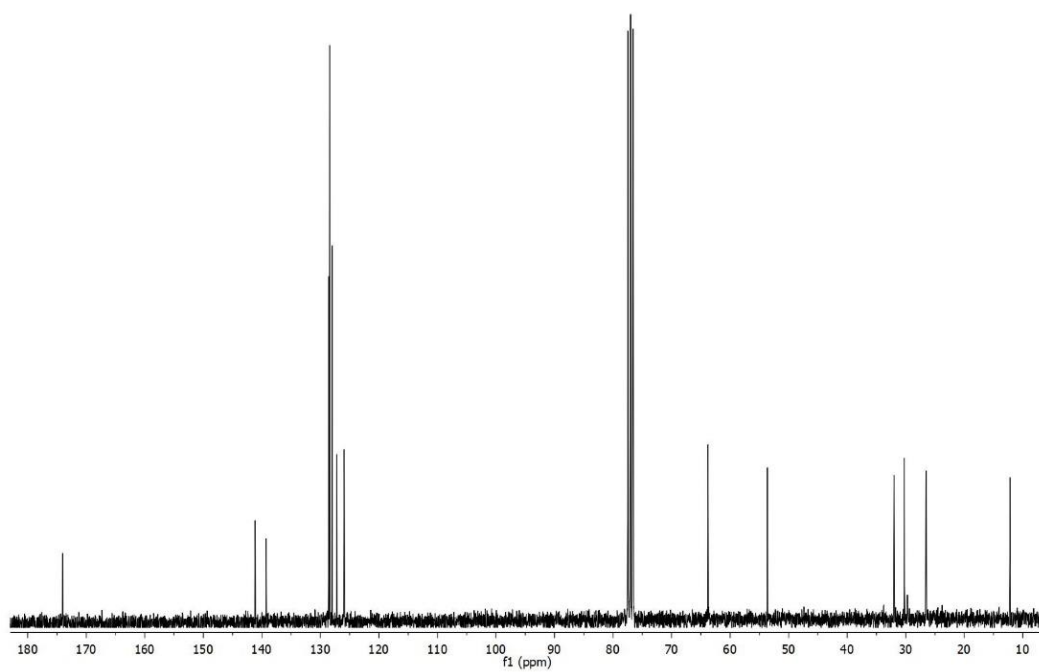

MS (EI)

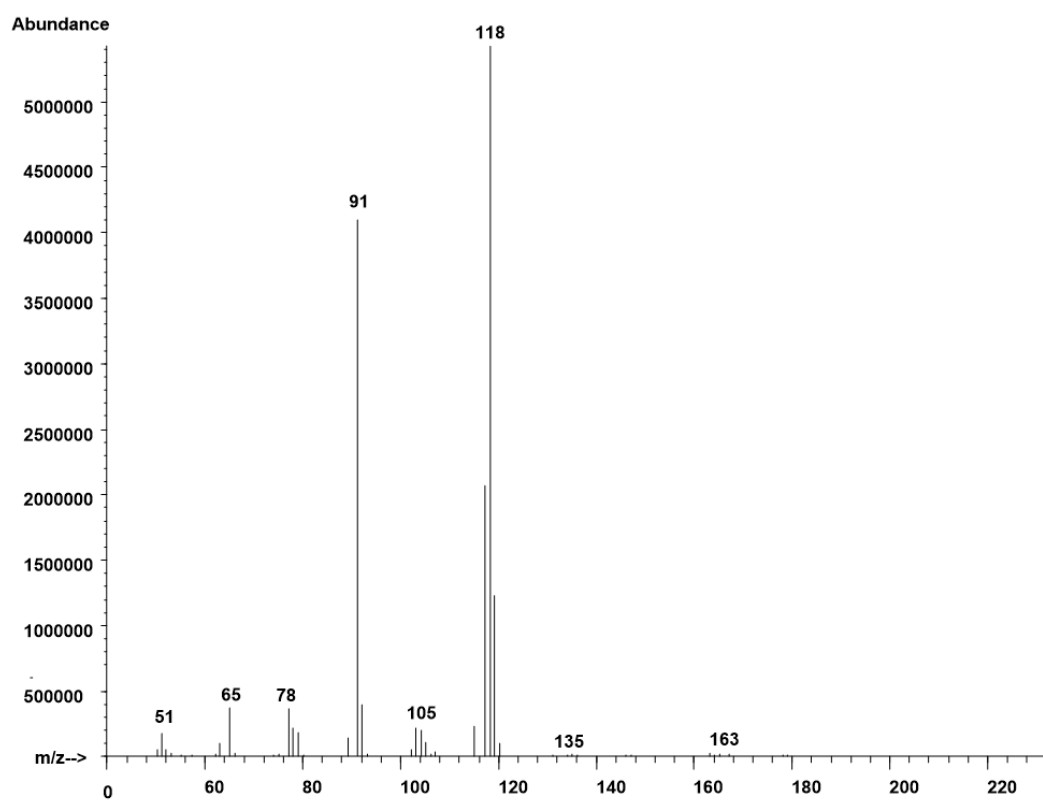

# PHENYL PHENYLACETATE (11)

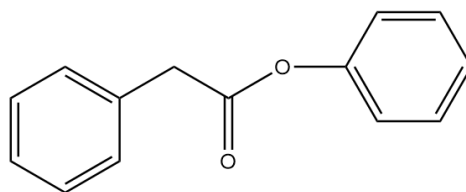

<sup>1</sup>H NMR

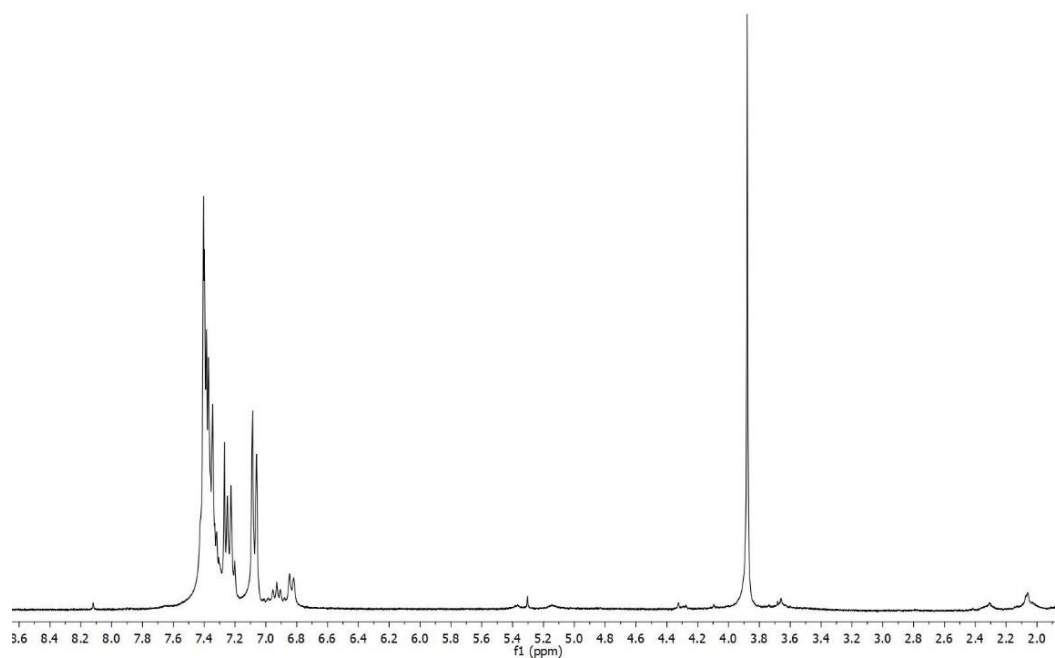

# MS (EI)

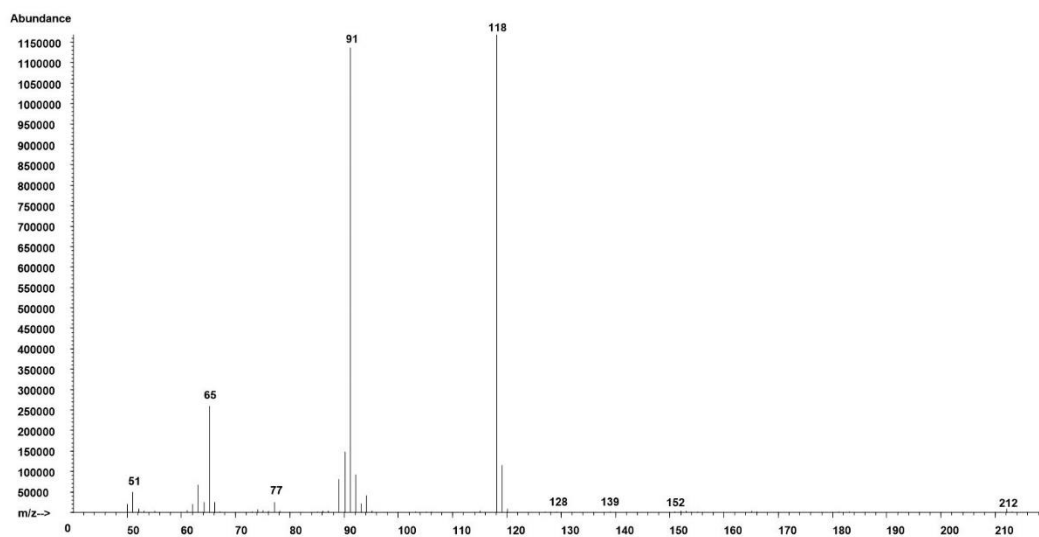

**BENZYL PHENYLACETATE (12)**

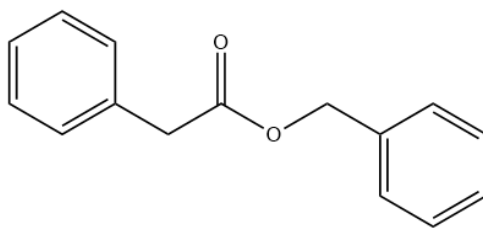

**$^1\text{H}$  NMR**

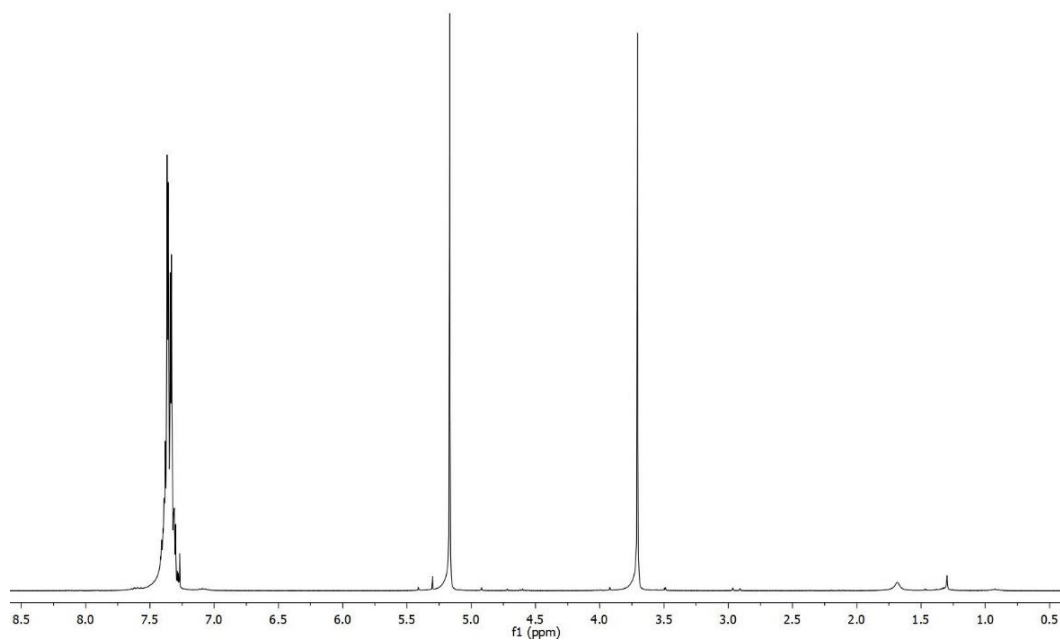

### $^{13}\text{C}$ NMR

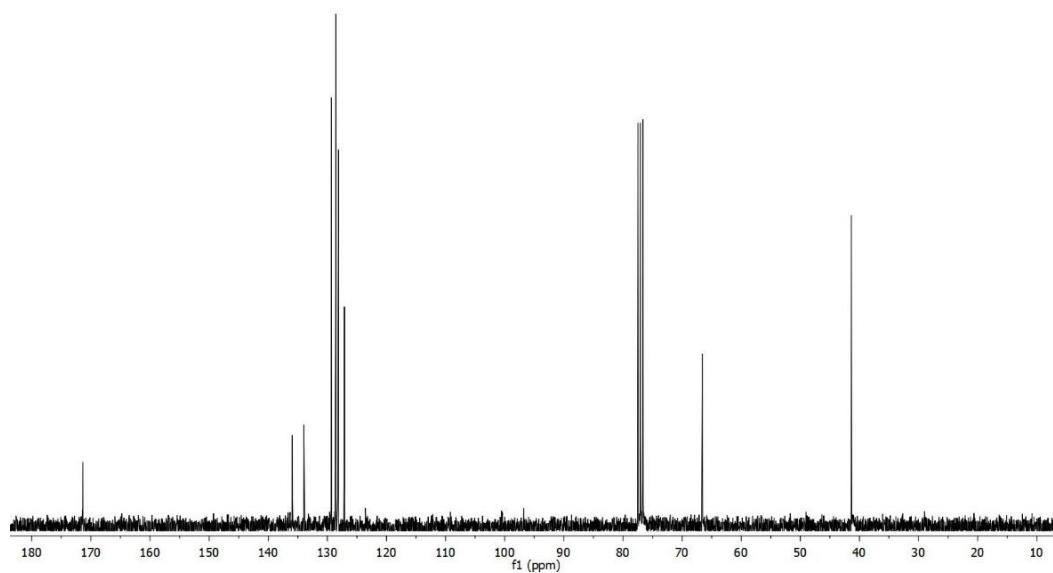

### MS (EI)

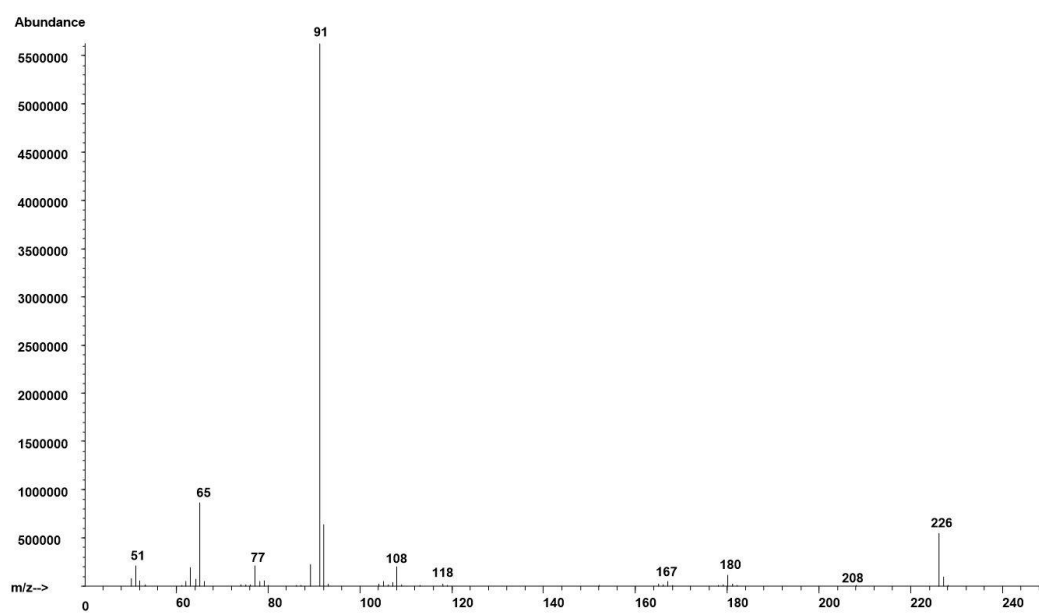



**BENZHYDRYL PHENYLACETATE (13)**

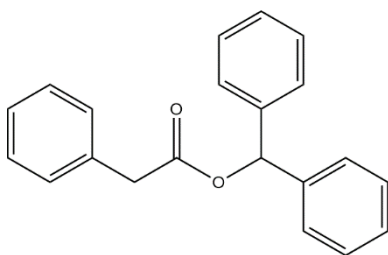

**<sup>1</sup>H NMR**

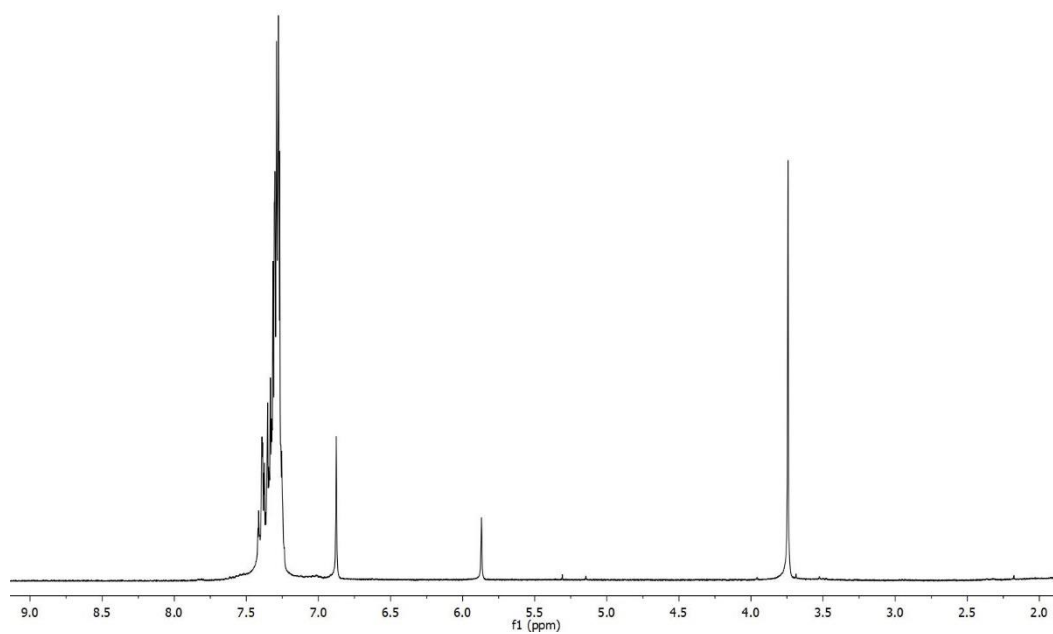

# <sup>13</sup>C NMR

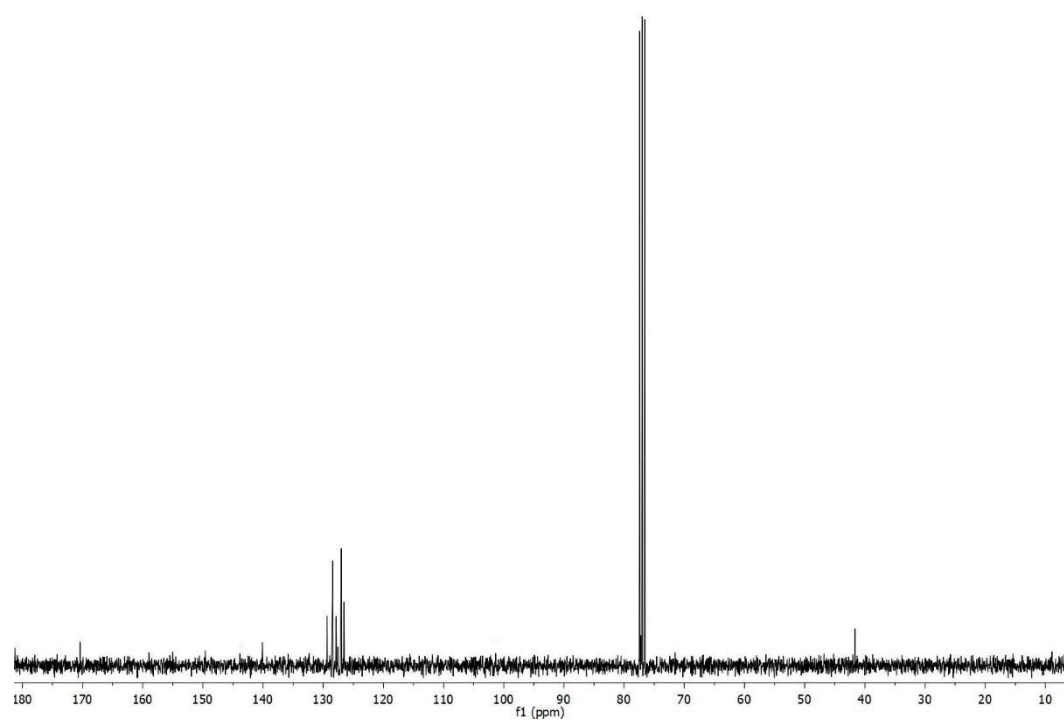

# MS (EI)

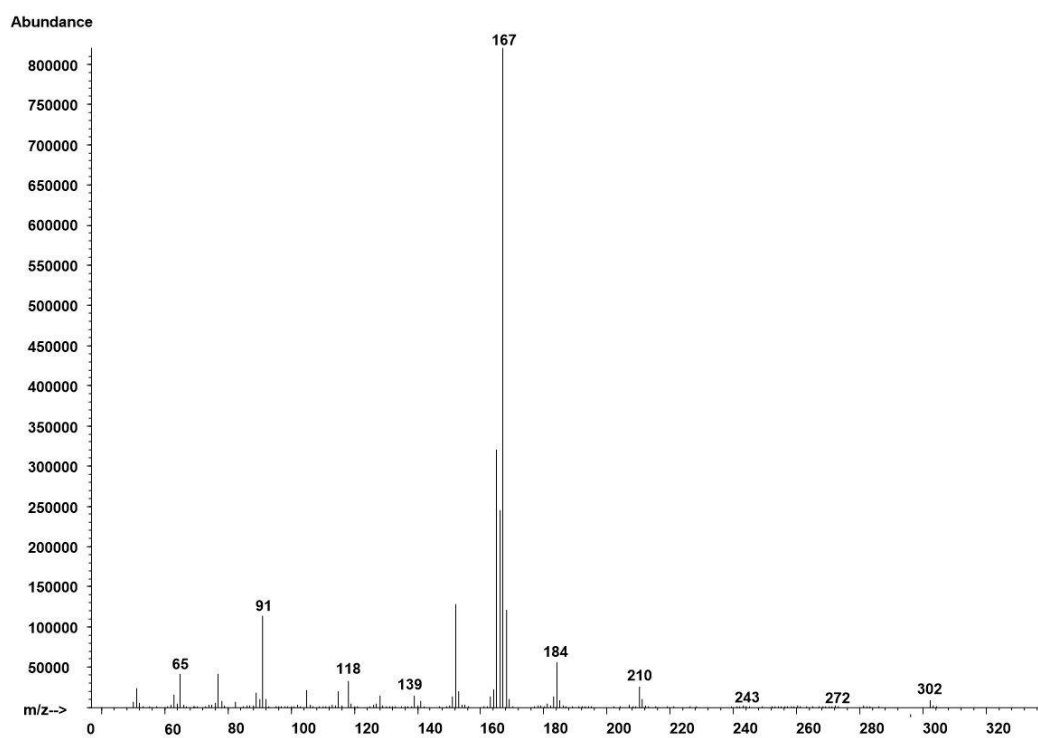

# ISOPROPYL PHENYLACETATE (14)

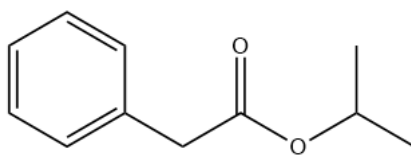

$^1\text{H}$  NMR

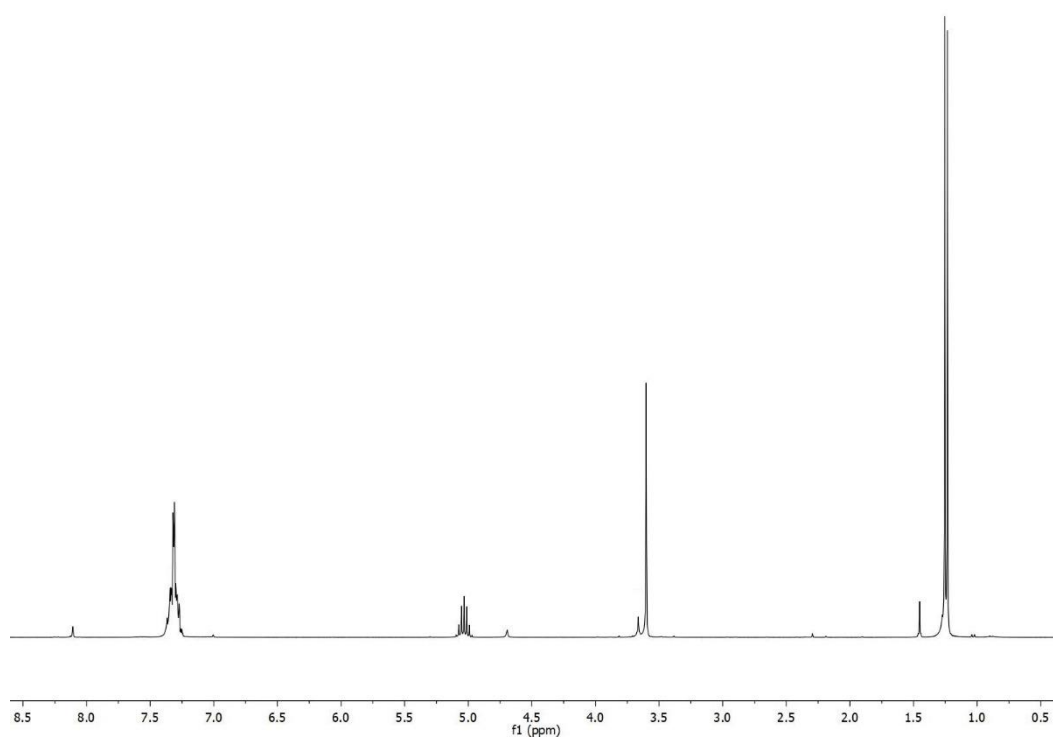

# <sup>13</sup>C NMR

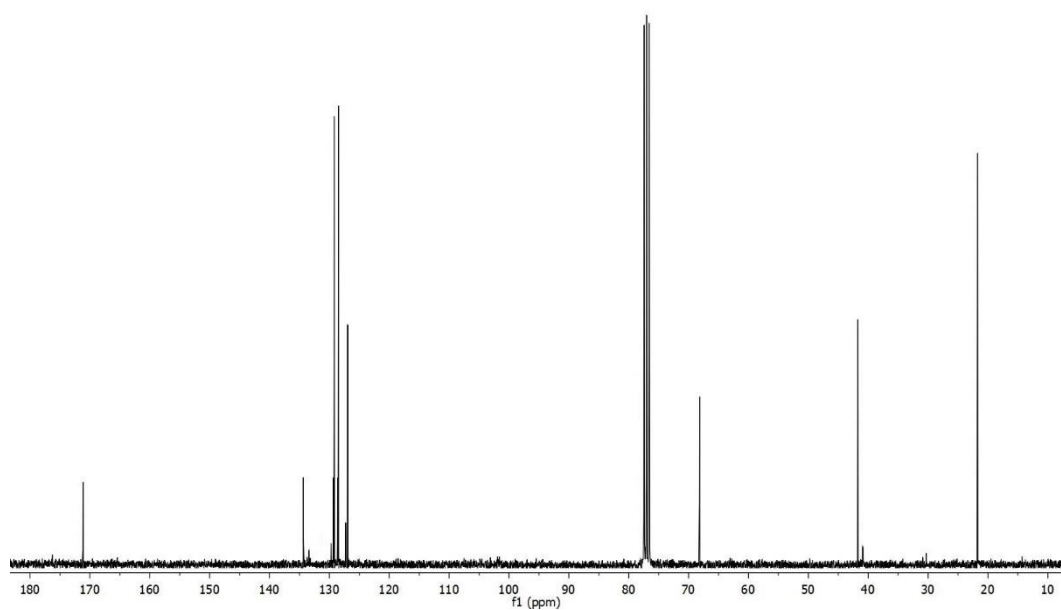

# MS (EI)

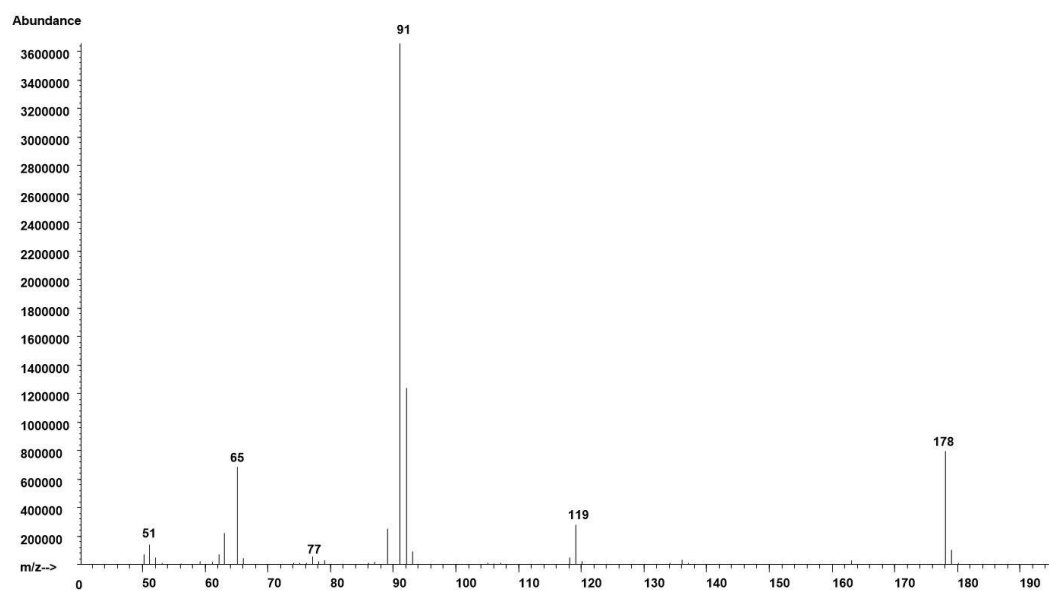

Supplement: s1 [file s1]
